# Supplementary material for: What are the elements of a whole system approach to community-centred public health? A qualitative study with public health leaders in England’s local authority areas
Source: PubMed Central journal article supplement — BMJ Open. 2020 Aug 26;10(8):e036044. doi: 10.1136/bmjopen-2019-036044 (PMC7451485; doi:10.1136/bmjopen-2019-036044), 2020-08-26
Supplement: bmjopen-2019-036044supp001.pdf [file bmjopen-2019-036044supp001.pdf]

## Supplementary file A: People's Panel survey schedule

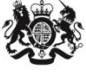

**Public Health  
England**

Protecting and improving the nation's health

# Healthy communities consultation: people's panel

## Introduction:

PHE recognises that communities matter for health.

'Community' as a term is used as shorthand for the relationships, bonds, identities and interests that join people together or give them a shared stake in a place, service, culture or activity. A community can be a geographic area or have a shared interest or identity such as faith-based or social group.

## How?

Community life, social connections, sense of belonging and having a voice in local decisions all contribute to health and wellbeing.

These community factors build our sense of control, resilience and wellbeing which also help protect us against illness and help us maintain a healthy lifestyle.

## Why does it matter for PHE?

Building strong, connected and inclusive communities is therefore a public health priority.

PHE has produced guidance on the evidence but wants to learn more about what works in creating healthy communities and placing communities at the heart of public health.

## We'd like your views:

1. How important is community life for your health and wellbeing and how does it impact?
2. How can public services best support communities to flourish? What actions are needed to ensure everyone can feel part of a community?
3. What things get in the way of or weaken community strengths and vitality?
4. What could the public health system do to put communities at the heart of public health?

**Thank you**
