# Supplementary material for: What are the elements of a whole system approach to community-centred public health? A qualitative study with public health leaders in England’s local authority areas
Source: PubMed Central journal article supplement — BMJ Open. 2020 Aug 26;10(8):e036044. doi: 10.1136/bmjopen-2019-036044 (PMC7451485; doi:10.1136/bmjopen-2019-036044), 2020-08-26
Supplement: bmjopen-2019-036044supp002.pdf [file bmjopen-2019-036044supp002.pdf]

### Supplementary File B. Rapid review on whole system approaches for community-centred public health: included studies

| Study                                                                                                                                                                                                    | Setting                                               | Study design                         | Summary of overall intervention                                                                                                                                                            | Description of community engagement                                                                                                                                                                                                                                                                                                                                                                    |
|----------------------------------------------------------------------------------------------------------------------------------------------------------------------------------------------------------|-------------------------------------------------------|--------------------------------------|--------------------------------------------------------------------------------------------------------------------------------------------------------------------------------------------|--------------------------------------------------------------------------------------------------------------------------------------------------------------------------------------------------------------------------------------------------------------------------------------------------------------------------------------------------------------------------------------------------------|
| <b>Group 1</b> = represents a sub sample of included studies (n=10) drawn from Bagnall et al's (2019) systematic review 'Whole systems approaches to obesity and other complex public health challenges' |                                                       |                                      |                                                                                                                                                                                            |                                                                                                                                                                                                                                                                                                                                                                                                        |
| Amed et al (2016) [1]                                                                                                                                                                                    | CANADA<br>2 large cities                              | Mixed-methods evaluation             | Live 5-2-1-0 was a multi-sector multi-component childhood obesity prevention initiative informed by systems thinking and an innovative knowledge transfer model.                           | Rooted in principles of Community-Based Participatory Research (CBPR)<br>Intensive community engagement and formation of multi-sectoral partnerships in communities. Supported by central organisation coordinating efforts.<br><br>Community specific action plans are tailored to local strengths, needs and priorities.                                                                             |
| Kegler et al. (2009) [2]                                                                                                                                                                                 | California, USA.<br>20 cities                         | Mixed methods evaluation; case study | California Healthy Cities and Communities (CHCC) initiatives based on a common set of principles including community ownership and participation.                                          | CHCC coalitions are major mechanism for resident involvement. Multi-sectoral coalitions formed with community membership.<br><br>Overall aim of CHCC to empower local communities/ organisations to improve health at a local level whilst also working to influence policy change. Residents and community partners involved from start in identification of local priorities and joint action plan.  |
| Larson et al. (2009) [3]                                                                                                                                                                                 | Nashville, USA                                        | Mixed methods evaluation             | REACH initiative aimed to educate, raise awareness and promote smoking cessation, targeted towards African Americans. Programme worked across policy, community, and individual levels.    | Health education and awareness raising across communities and in range of community settings. Education and training of community volunteers to deliver health messages and smoking cessation classes in community.<br><br>Community engagement in design of intervention not reported.                                                                                                                |
| Liao et al (2010) [4]                                                                                                                                                                                    | 42 US communities with high proportion of BAME groups | Prospective cohort study             | Racial and Ethnic Approaches to Community Health (REACH) initiative: a nation-wide project that empowers local communities to actively participate in the improvement of their own health. | REACH supported development of community coalitions to design, deliver and evaluate 'community-driven' strategies.<br><br>Culturally-specific health education campaigns through media and community settings. Links to community leaders and local change agents.<br><br>Community & systems change focused on reduction of barriers to health, including building 'culturally competent' health care |

| Study                      | Setting                                         | Study design             | Summary of overall intervention                                                                                                                                                                                                           | Description of community engagement                                                                                                                                                                                                                                                                                                                           |
|----------------------------|-------------------------------------------------|--------------------------|-------------------------------------------------------------------------------------------------------------------------------------------------------------------------------------------------------------------------------------------|---------------------------------------------------------------------------------------------------------------------------------------------------------------------------------------------------------------------------------------------------------------------------------------------------------------------------------------------------------------|
| Lieberman et al (2013) [5] | Rockland, New York City, USA                    | Cross-sectional survey   | Put It Out Rockland (PIOR): strategic planning process to build multi-sectoral, multi-level theory-based intervention. Essential Public Health Model – Community mobilisation is one of 9 elements.                                       | Community engagement mostly focused on partnership working with community organisations and 'non-traditional providers' eg schools, businesses<br><br>PIOR offered group support for smoking cessation, including in community organisations.                                                                                                                 |
| Mead et al. (2013) [6]     | Northwest territories, Canada (Canadian Arctic) | Natural experiment       | Healthy Foods North is a community based, multi-institutional nutritional and lifestyle intervention. Aims to improve food-related psychosocial factors and behaviours among Inuit and Inuvialuit.                                        | Community involvement in design, delivery and evaluation throughout the development of intervention and research study.<br><br>Some mass media communication and health education in community settings; however, materials etc designed with community involvement.<br><br>Community members recruited to deliver intervention and as community researchers. |
| Schulz et al. (2005) [7]   | Detroit, USA                                    | Case Study               | HEED (healthy eating and exercising to reduce diabetes) was a community-based participatory diabetes intervention. Goal to reduce the risk, or delay the onset, of diabetes by encouraging moderate physical activity and healthy eating. | HEED project developed from a community partnership and through using CBPR. Diabetes identified as a community priority through CBPR.<br><br>Recruited and trained community residents including youth leaders and community organisers.<br><br>Reflecting community experiences of discrimination, segregation and diabetes.                                 |
| Schwartz et al. (2010) [8] | Rural and deprived regions of California USA    | Mixed methods evaluation | Central California Regional Obesity Prevention Program (CCROPP) aimed to promote safe places for physical activity; increase access to fruit & veg; and support community and youth engagement.                                           | Community engagement seen as an 'essential strategy' for environmental change.<br><br>Community residents and youth at each locality engaged in environmental assessments and identifying priorities for action then becoming advocates for local change.<br><br>Multi-sectoral approach. Partnerships between community and other sectors key.               |
| Simos et al. (2015) [9]    | European Healthy Cities Network                 | Mixed methods evaluation | Use of the Health Impact Assessment in phase V of European Healthy Cities Network.                                                                                                                                                        | Involvement of citizens in a municipality (and wider stakeholders) was one of 5 factors increasing acceptability of intervention.                                                                                                                                                                                                                             |

| Study                                                                                                                                                                                                                           | Setting                                                         | Study design                                                                   | Summary of overall intervention                                                                                                                                                                                                                                                                                                                                                 | Description of community engagement                                                                                                                                                                                                                                                                                                                                                                                                                                        |
|---------------------------------------------------------------------------------------------------------------------------------------------------------------------------------------------------------------------------------|-----------------------------------------------------------------|--------------------------------------------------------------------------------|---------------------------------------------------------------------------------------------------------------------------------------------------------------------------------------------------------------------------------------------------------------------------------------------------------------------------------------------------------------------------------|----------------------------------------------------------------------------------------------------------------------------------------------------------------------------------------------------------------------------------------------------------------------------------------------------------------------------------------------------------------------------------------------------------------------------------------------------------------------------|
| Wagenaar et al (1999) [10]                                                                                                                                                                                                      | Mid-West<br>USA                                                 | Mixed methods evaluation;<br>RCT qualitative study                             | Communities Mobilizing for Change on Alcohol (CMCA) Intervention focused on policy change and working with the communities involved to change attitudes toward underage drinking.                                                                                                                                                                                               | Used a community organising approach to achieve policy change in local institutions.<br><br>Community organisers used 7 stage process in each community; moving from a community assessment and identifying leaders through to action planning and institutionalising change.                                                                                                                                                                                              |
| <b>Group 2</b> = Included studies identified from a literature search conducted by PHE Knowledge and Libraries. 14 publications that combined a whole system approach with community-centred strategy/programmes were reviewed. |                                                                 |                                                                                |                                                                                                                                                                                                                                                                                                                                                                                 |                                                                                                                                                                                                                                                                                                                                                                                                                                                                            |
| Brownson et al. (2015) [11]                                                                                                                                                                                                     | 49 communities , USA & Puerto Rico                              | Mixed method evaluation                                                        | Healthy Kids, Healthy Communities (HKHC) is national multi-level programme focused on policy, system and environmental changes. Focus on inequalities and children most at risk.                                                                                                                                                                                                | Community partnership/coalition approach. Levels of action: Individual, Community, State/policy.<br><br>Community capacity seen as the ability to identify problems and to develop solutions and mobilise resources. Evaluation principles based on respecting community knowledge.                                                                                                                                                                                        |
| Cheadle et al.(2008)[12]                                                                                                                                                                                                        | 14 health departments<br>39 community groups.<br>California, US | Mixed method evaluation                                                        | Partnership for Public Health (PPH) – comprehensive community initiative (CCI). Involved community and organisational capacity building.<br><br>Many of partnerships in disadvantaged areas.                                                                                                                                                                                    | Dual focus on building community capacity for residents to engage in community health partnerships and capacity building for health departments to respond to community-driven priorities.<br><br>Collaborations and partnerships are key to comprehensive community initiatives. Partnerships with community groups are platforms for long term change.                                                                                                                   |
| Cohen [13] (2016)<br><br>Sims & Aboelata [14] (2019)                                                                                                                                                                            | California<br>US                                                | Expert opinion<br><br>Later article presents 'System of Prevention' framework. | Prevention Institute (PI) developing prevention strategies for policy and practice at local, state & federal levels. 'System of Prevention' is described as a 'framework for a systems approach to population health that can achieve health equity'<br><br>Frameworks and practical tools produced. Eg THRIVE tool (Tool for Health and Resilience in Vulnerable Environments) | PI approach is based on a social determinants of health approach. Part of work at PI is supporting community-led initiatives. Building local coalitions that address inequities is key element.<br><br>THRIVE tool can help a community identify elements that require action. Based on 4 elements: <i>Equitable Opportunity; Medical Services; the Place; People.</i><br><br>In the System of Prevention model 'Elevate community voices and leadership' is key strategy. |

| Study                                  | Setting                                                                                 | Study design               | Summary of overall intervention                                                                                                                                                                                                                                                                                                                                                                                 | Description of community engagement                                                                                                                                                                                                                                                                                                                                                           |
|----------------------------------------|-----------------------------------------------------------------------------------------|----------------------------|-----------------------------------------------------------------------------------------------------------------------------------------------------------------------------------------------------------------------------------------------------------------------------------------------------------------------------------------------------------------------------------------------------------------|-----------------------------------------------------------------------------------------------------------------------------------------------------------------------------------------------------------------------------------------------------------------------------------------------------------------------------------------------------------------------------------------------|
| Hiatt et al [15] (2018)                | San Francisco US                                                                        | Description of model       | Cancer prevention approach based on addressing social determinants of health through multi sector partnerships                                                                                                                                                                                                                                                                                                  | Aimed to align cancer partnership with existing community coalitions<br><br>Community engagement and needs assessment critical part of process of building wider partnership                                                                                                                                                                                                                  |
| Jones & Louis [16] (2017)              | US<br>a) Georgia and Florida - birth outcomes<br>b) Delaware and Iowa - chronic disease | Comparative case study     | State Population Health Strategies – multilevel. Analysis of positive outliers ie four states that had success in health trends<br><br>8 elements identified from outliers:<br>1. Government leadership initiating<br>2. Goldilocks targets<br>3. Multisector ownership<br>4. Measurement<br>5. Focus on disparities;<br>6. Get local<br>7. Balance top down with bottom up<br>8. Coordinate not control (p.7). | Local focus and involvement of community-based organisations were key.<br><br>Get local meant involving community-based organisations that have 'close ties with most disadvantaged groups'<br><br>Recommendation to balance top down with bottom up and customise local initiatives                                                                                                          |
| Karwalajty s & Kaczorowski [17] (2010) | Canada & other Countries                                                                | Description of model       | Canadian CVD and hypertension population health programme<br><br>Argues for population health approach.                                                                                                                                                                                                                                                                                                         | Community mobilisation and collaborations – methods to develop partnerships and mobilisation can be applied for other conditions/issues<br><br>Community organisation and mobilisation approaches aid reach. This can include use of Lay Health Workers.                                                                                                                                      |
| Khare et al. [18] (2015)               | Women & girls<br><br>US                                                                 | Description of model       | Coalition for a Healthier Community (CHC) uses gender-based approach– at multiple levels: individual, family, community, policy.                                                                                                                                                                                                                                                                                | Unique features of a gender-based approach, with community needs assessment (gender based analysis) and a strategic approach to incorporating grassroots organisations into coalitions. Tailored interventions and programs based on local needs and data.<br><br>Coalitions are a key mechanism. Supporting coalitions is linked to long term commitment & building empowering partnerships. |
| Matheson et al. [19] (2009)            | NZ – various communities                                                                | Comparative case study     | Community-based interventions:<br>a) Housing and health intervention<br>b) Intersectoral community-action for health                                                                                                                                                                                                                                                                                            | Applying complex systems thinking to community-based interventions.                                                                                                                                                                                                                                                                                                                           |
| Putland et al.[20] (2013)              | Australia                                                                               | Multiple case study design | Looking at how social capital is beneficial for health and how this theory can be supported through practice.                                                                                                                                                                                                                                                                                                   | Community development methods used in three projects, linked with other approaches such as urban regeneration and arts initiatives<br><br>Found that policy/planners viewed community development as 'operational arm of social capital'. Local workers key to translating social capital as an abstract term to practical activities.                                                        |

| Study                         | Setting                       | Study design                             | Summary of overall intervention                                                                                                                                                                                                                                                                                           | Description of community engagement                                                                                                                                                                                                                                                                                                                                                                     |
|-------------------------------|-------------------------------|------------------------------------------|---------------------------------------------------------------------------------------------------------------------------------------------------------------------------------------------------------------------------------------------------------------------------------------------------------------------------|---------------------------------------------------------------------------------------------------------------------------------------------------------------------------------------------------------------------------------------------------------------------------------------------------------------------------------------------------------------------------------------------------------|
|                               |                               |                                          |                                                                                                                                                                                                                                                                                                                           | Collaborations and intersectoral approach essential and support needed at all levels.                                                                                                                                                                                                                                                                                                                   |
| Robinson & Elliot [21] (2000) | Ontario Canada                | Qualitative study                        | Community-based heart health initiatives                                                                                                                                                                                                                                                                                  | Distinguishes between community development, community organisation (collaborative approach) and community-based (services implementing in the community). Differences in practice explained by contexts.                                                                                                                                                                                               |
| Taylor et al. [22] (2013)     | Rural communities , Australia | Qualitative – multiple case study design | Community partnerships for primary prevention. These are coalitions between different sectors and communities. 4 types of partnership with varying degrees of community control. <ul style="list-style-type: none"> <li>• Developmental</li> <li>• Instrumental</li> <li>• Empowerment</li> <li>• Contribution</li> </ul> | Community partnerships seen as an essential approach to health promotion. Working on notion of a community of place as a 'field of interaction'. Community action and bonds within a place forms basis of collective/communitarian approach to health. Critique offered that much of community 'resource' is lost to system because health sector lacks capacity/ability to form strategic partnerships |
| Tung et al. [23] (2018)       | Chicago US                    | Qualitative study                        | Diabetes intervention                                                                                                                                                                                                                                                                                                     | Cross-sector collaboration around diabetes prevention based around an academic medical centre. Collaboration viewed as an opportunity for greater impact but need to start by looking at what community organisations are doing.                                                                                                                                                                        |
| Woolf et al. [24] (2011)      | US                            | Expert opinion - learning from projects  | Citizen-centred health promotion. Recommendations to support healthy behaviours based on an understanding of need to focus on social and environmental factors and limits of focusing on health education for individuals.                                                                                                | Citizen-centred health promotion described as multisectoral, community-wide action to create healthier conditions. Needs investment and support in partnerships.                                                                                                                                                                                                                                        |

## References

1. Amed S, Shea S, Pinkney S, Wharf Higgins J, Naylor P-J: Wayfinding the Live 5-2-1-0 Initiative-At the Intersection between Systems Thinking and Community-Based Childhood. Obesity Prevention. *International Journal of Environmental Research and Public Health* 2016, 13(6).
2. Kegler, M.C., Painter, J.E., Twiss, J.M., Aronson, R. and Norton, B.L. Evaluation findings on community participation in the California Healthy Cities and Communities program. *Health Promotion International*, 2009, 24(4): 300-310.
3. Larson, C.O., Schlundt, D.G., Patel, K., Wang, H., Beard, K. and Hargreaves, M.K. Trends in smoking among African-Americans: a description of Nashville's REACH 2010 initiative. *Journal of Community Health*, 2009, 34(4): 311-320.

4. Liao, Y. L., Tsoh, J.Y., Chen, R., Foo, M.A., Garvin, C.C., Grigg-Saito, D., Liang, S., McPhee, S., Nguyen, T.T., Tran, J.H. and Giles, W. H. Decreases in Smoking Prevalence in Asian Communities Served by the Racial and Ethnic Approaches to Community Health (REACH) Project. *American Journal of Public Health*, 2010, 100: 853-860.
5. Lieberman, L., Diffley, U., King, S., Chanler, S., Ferrara, M., Alleyne, O. and Facelle, J. Local tobacco control: application of the essential public health services model in a county health department's efforts to Put It Out Rockland. *American Journal of Public Health*, 2013, 103(11):1942-1948.
6. Mead, E.L., Gittelsohn, J., Roache, C., Corriveau, A. and Sharma, S. A community-based, environmental chronic disease prevention intervention to improve healthy eating psychosocial factors and behaviors in indigenous populations in the Canadian Arctic. *Health Education & Behavior*, 2013, 40(5): 592-602.
7. Schulz, A.J., Zenk, S., Odoms-Young, A., Hollis-Neely, T., Nwankwo, R., Lockett, M., Ridella, W. and Kannan, S. Healthy eating and exercising to reduce diabetes: exploring the potential of social determinants of health frameworks within the context of community-based participatory diabetes prevention. *American Journal of Public Health*, 2005, 95(4): 645-651.
8. Schwarte, L., Samuels, S.E., Capitman, J., Ruwe, M., Boyle, M. and Flores, G. The Central California Regional Obesity Prevention Program: changing nutrition and physical activity environments in California's heartland. *American Journal of Public Health*, 2010, 100(11): 2124-2128.
9. Simos, J., Spanswick, L., Palmer, N. and Christie, D. The role of health impact assessment in Phase V of the Healthy Cities European Network. *Health Promotion International*, 2015, 30 (suppl 1), pp.i71-i85.
10. Wagenaar, A.C., Gehan, J.P., Jones-Webb, R., Toomey, T.L., Forster, J.L., Wolfson, M. and Murray D.M. Communities mobilizing for change on alcohol: Lessons and results from a 15-community randomized trial. *Journal of Community Psychology*, 1999, 27(3): 315-326.
11. Brownson, R.C., A.L. Kemner, and L.K. Brennan, (2015) Applying a mixed-methods evaluation to Healthy Kids, Healthy Communities. *Journal of Public Health Management Practice*, 2015. 21 Suppl 3:S16-S26.
12. Cheadle, A., C. Hsu, P. M. Schwartz, D. Pearson, H. P. Greenwald, W. L. Beery, G. Flores and M. Campbell Casey. Involving local health departments in community health partnerships: evaluation results from the Partnership for the Public's Health Initiative. *Journal of Urban Health* 2008, 85(2):162-177.
13. Cohen, H., Building a thriving nation: 21st century vision and practice to advance health and equity. *Health Education & Behavior*, 2016. 43(2): 125-132.
14. Sims, J. and M.J. Aboelata, A System of Prevention: Applying a Systems Approach to Public Health. *Health Promotion Practice*, 2019, 20(4): 476-482
15. Hiatt, R. A., A. Sibley, L. Fejerman, S. Glantz, T. Nguyen, R. Pasick, N. Palmer, A. Perkins, M. B. Potter, M. Somsouk, R. A. Vargas, L. J. van 't Veer and A. Ashworth. The San Francisco Cancer Initiative: A Community Effort To Reduce The Population Burden Of Cancer. *Health Affairs*, 2018, 37(1): 54-61.6
16. Jones, D.K. and C.J. Louis, *State Population Health Strategies that make a difference: project summary and findings*. 2017, Milbank Memorial Fund: New York.
17. Karwalajtys, T. and J. Kaczorowski. An integrated approach to preventing cardiovascular disease: community-based approaches, health system initiatives, and public health policy. *Risk Management and Healthcare Policy*, 2010. 3, 39-48.
18. Khare, M.M., A.E. Nunez, and B.F. James, Coalition for a Healthier Community: Lessons learned and implications for future work. *Evaluation and Program Planning*, 2015. 51: 85-88.

19. Matheson, A., K. Dew, and J. Cumming, Complexity, evaluation and the effectiveness of community-based interventions to reduce health inequalities. *Health Promotion Journal of Australia*, 2009, 20(3): 221-226.
20. Putland, C., F. Baum, A. Ziersch, K. Arthurson and D. Pomagalska. Enabling pathways to health equity: developing a framework for implementing social capital in practice. *BMC Public Health*, 2013, 13(1): 517.
21. Robinson, K.L. and S.J. Elliott. The practice of community development approaches in heart health promotion. *Health Education Research*, 2000, 15(2): 219-231.
22. Taylor, J., A. Braunack-Mayer, M. Cargo, S. Larkins and R. Preston. A role for communities in primary prevention of chronic illness? Case studies in regional Australia. *Qualitative Health Research*, 2013, 23(8): 1103-1113..
23. Tung, E. L., K. E. Gunter, N. Q. Bergeron, S. T. Lindau, M. H. Chin and M. E. Peek. Cross-Sector Collaboration in the High-Poverty Setting: Qualitative Results from a Community-Based Diabetes Intervention. *Health Services Research*, 2018, 53(5): 3416-3436.
24. Woolf, S. H., M. M. Dekker, F. R. Byrne and W. D. Miller. Citizen-centered health promotion: building collaborations to facilitate healthy living. *American Journal of Preventive Medicine*, 2011, 40,(1 Suppl 1): S38-S47.
