# Supplementary material for: What are the elements of a whole system approach to community-centred public health? A qualitative study with public health leaders in England’s local authority areas
Source: PubMed Central journal article supplement — BMJ Open. 2020 Aug 26;10(8):e036044. doi: 10.1136/bmjopen-2019-036044 (PMC7451485; doi:10.1136/bmjopen-2019-036044), 2020-08-26
Supplement: bmjopen-2019-036044supp003.pdf [file bmjopen-2019-036044supp003.pdf]

## Where to start

Any local area, whatever their experience, has the potential to build a whole system approach to community-centred public health. Local leaders, who were interviewed as part of developing this framework, recommended some good starting points:

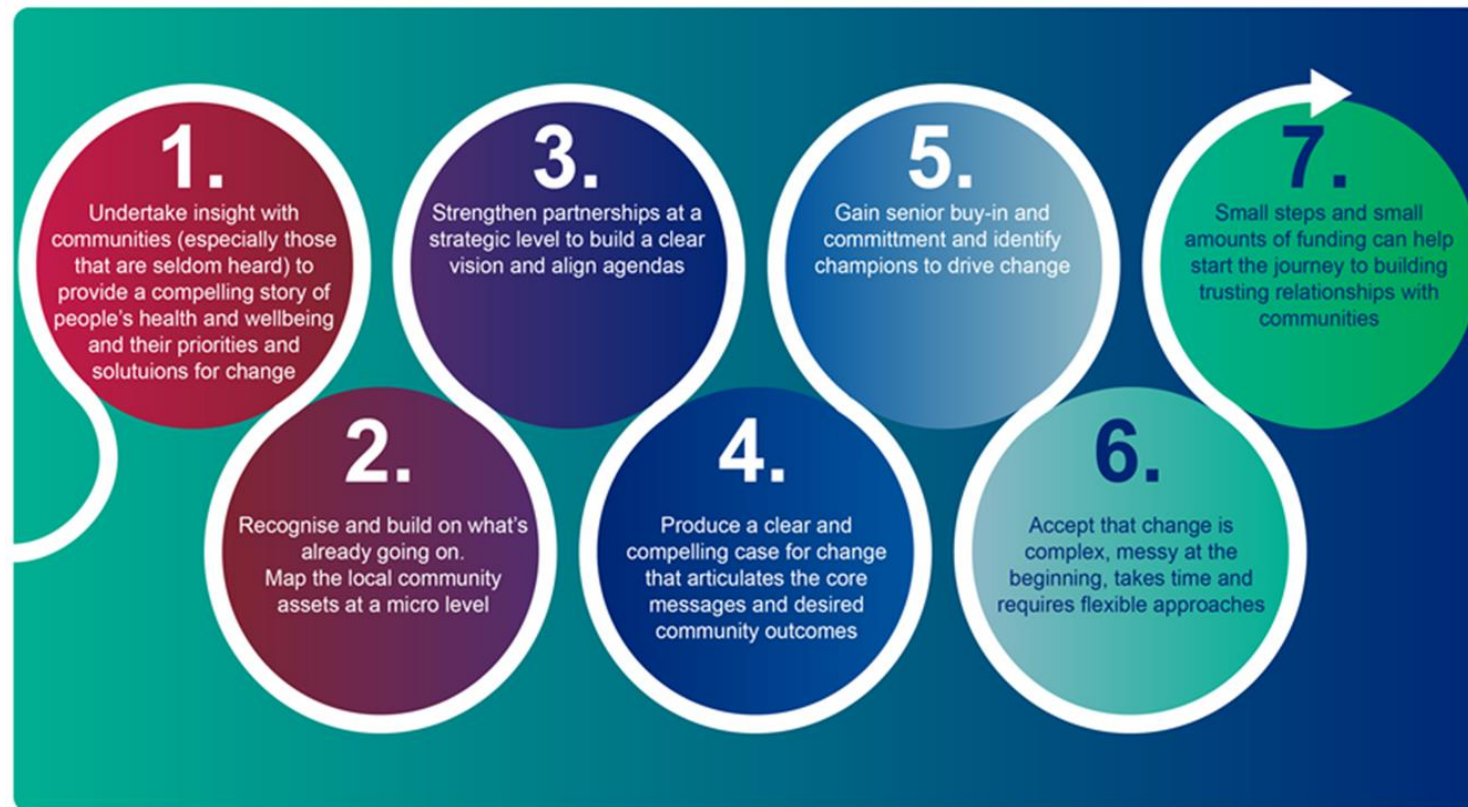

Source: Public Health England, "Community-centred public health: taking a whole system approach. Briefing of research findings," Public Health England, London, 2020. <https://www.gov.uk/government/publications/community-centred-public-health-taking-a-whole-system-approach>. Subject to Crown Copyright and published under the Open Government license: <http://www.nationalarchives.gov.uk/doc/open-government-licence/version/3/>
